# Supplementary material for: An in situ formed Se/CMK-3 composite for rechargeable lithium-ion batteries with long-term cycling performance
Source: Royal Society of Chemistry journal article supplement (doi:10.1039/c6ta05029h), 2016-01-01
Supplement: c6ta05029h1.pdf [file c6ta05029h1.pdf]

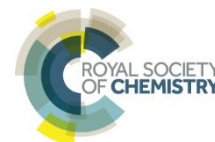

Journal Name

ARTICLE

Supporting Information

**In-situ formed Se/CMK-3 Composite for Rechargeable Lithium-ion Batteries with a Long-Term Cycling Performance**

Cheng Zheng,<sup>a, b</sup> Minying Liu,<sup>a, b</sup> Wenqiang Chen,<sup>a, b</sup> Lingxing Zeng<sup>c</sup> and Mingdeng Wei \*<sup>a, b</sup>

<sup>a</sup> State Key Laboratory of Photocatalysis on Energy and Environment, Fuzhou University, Fuzhou, Fujian 350002, China

<sup>b</sup> Institute of Advanced Energy Materials, Fuzhou University, Fuzhou, Fujian 350002, China

<sup>c</sup> College of Environment Science and Engineering, Fujian Normal University, Fuzhou, Fujian 350007, China

\*Corresponding author: Mingdeng Wei

Tel./fax: +86-591-83753180

E-mail address: [wei-mingdeng@fzu.edu.cn](mailto:wei-mingdeng@fzu.edu.cn)

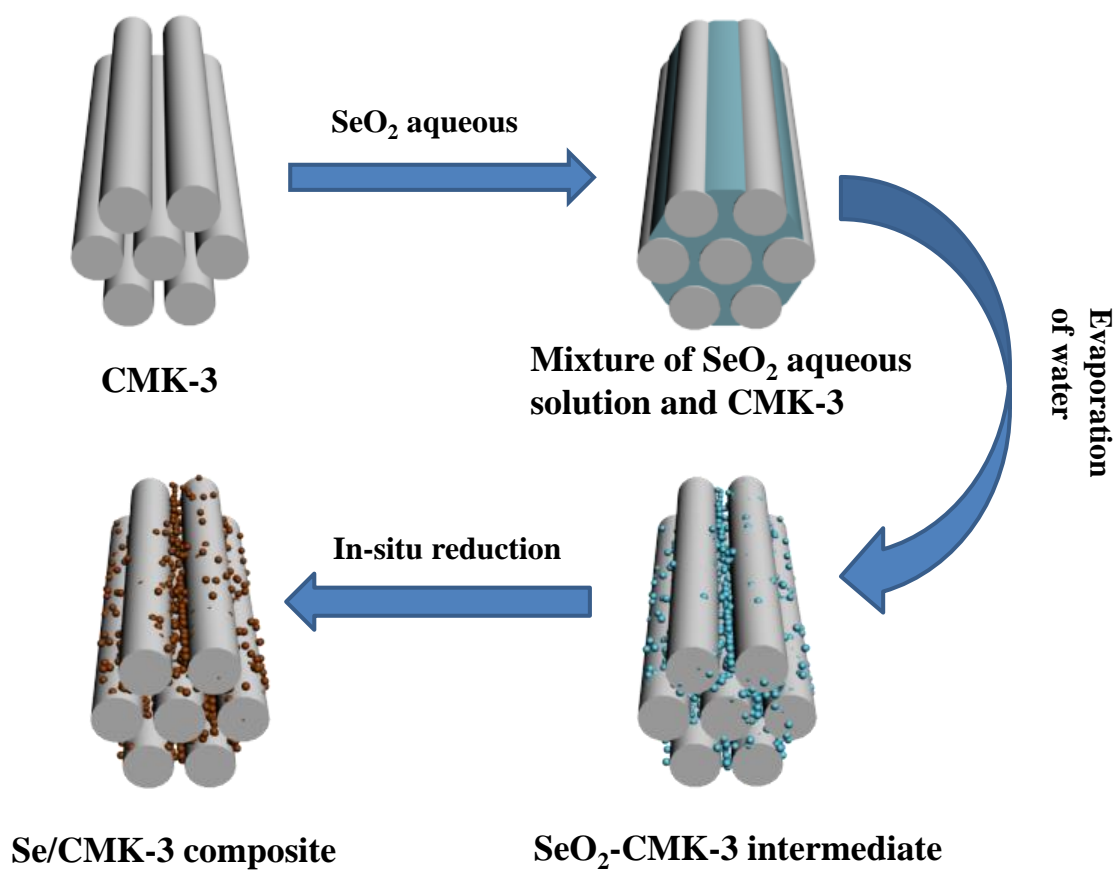

**Fig. S1** Schematic illustration for the synthetic procedure of the Se/CMK-3 composite.

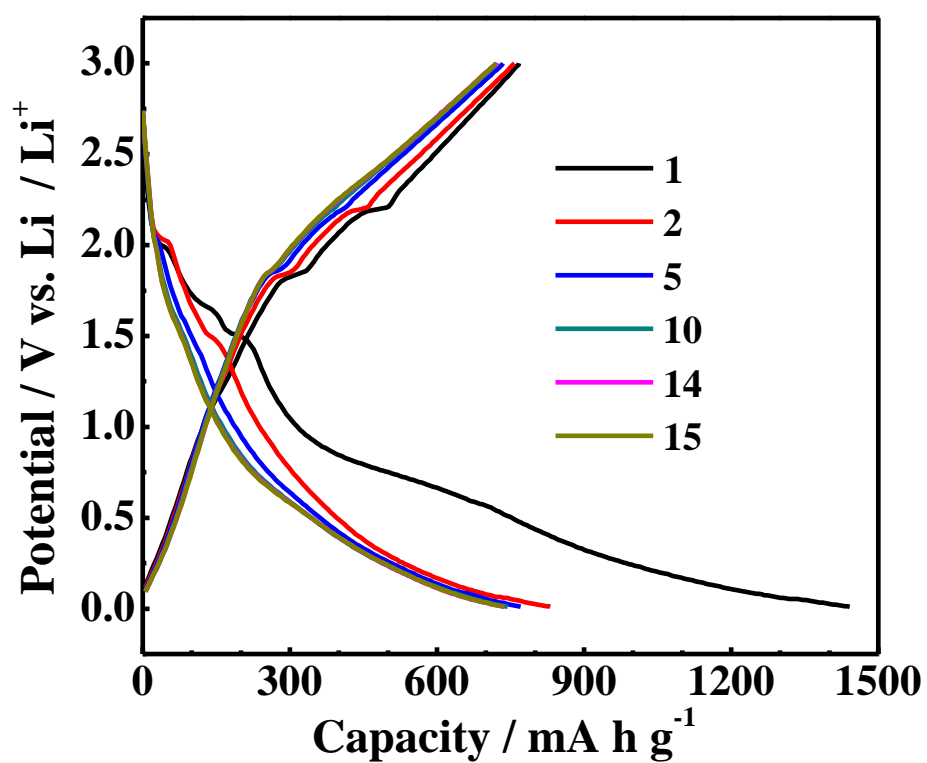

**Fig. S2** Charge/discharge profiles for the Se/CMK-3 composite within a voltage window of 0.01-3 V.

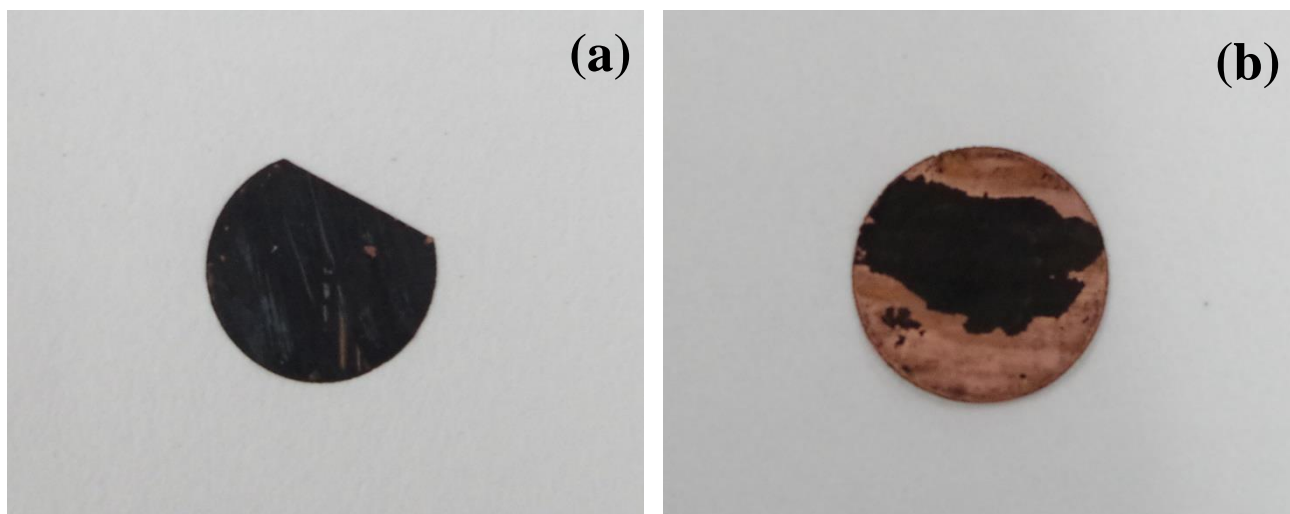

**Fig. S3** Digital photographs of (a) Se/CMK-3 and (b) Se anode after 60 cycles at 1 C. The cells were disassembled in air and the working electrode was washed with running ethanol.
